# Supplementary material for: The contralateral progression in a cohort of Chinese adult patients with unilateral moyamoya disease after revascularization: a single-center long-term retrospective study
Source: Springer Nature journal article supplement (doi:10.1007/s00701-022-05153-6), 2022-03-26
Supplement: MOESM1 [file 20263400]

| Patient No. | Age | GENDE R | Original Lesion side | Original lesion side-- DSA grade | Onset (I: Ischemic I, H: Hemorrhagic H, T+O: TIA and other) | Hypertension (yes Y, no N) | Aneurysm (yes Y, no N) | Diabetes (yes Y, no N) | Other (yes Y, no N) | Family history (yes Y, no N) | Follow-up duration | Process (yes Y, no N) | Process side (Left, Right, Right) | Process DSA grade | Process symptom (I: Ischemic I, H: Hemorrhagic H, T+O: TIA and other) |
|-------------|-----|---------|----------------------|----------------------------------|-------------------------------------------------------------|----------------------------|------------------------|------------------------|---------------------|------------------------------|--------------------|-----------------------|-----------------------------------|-------------------|-----------------------------------------------------------------------|
| 1           | 31  | M       | Left                 | 5                                | I                                                           | Y                          | N                      | N                      | N                   | N                            | 54                 | Y                     | Right                             | 3                 | I                                                                     |
| 2           | 34  | F       | Right                | 3                                | I                                                           | N                          | N                      | Y                      | N                   | N                            | 72                 | N                     |                                   |                   |                                                                       |
| 3           | 37  | M       | Right                | 3                                | I                                                           | N                          | N                      | N                      | N                   | N                            | 54                 | N                     |                                   |                   |                                                                       |
| 4           | 38  | M       | Right                | 3                                | H                                                           | N                          | N                      | N                      | N                   | N                            | 62                 | Y                     | Left                              | 3                 | H                                                                     |
| 5           | 39  | F       | Right                | 3                                | T+O                                                         | N                          | N                      | N                      | N                   | N                            | 62                 | N                     |                                   |                   |                                                                       |
| 6           | 39  | F       | Right                | 3                                | I                                                           | N                          | N                      | N                      | N                   | N                            | 78                 | N                     |                                   |                   |                                                                       |
| 7           | 39  | F       | Right                | 2                                | T+O                                                         | N                          | Y                      | N                      | N                   | Y                            | 64                 | Y                     | Left                              | 2                 | T+O                                                                   |
| 8           | 39  | F       | Left                 | 4                                | T+O                                                         | N                          | N                      | N                      | N                   | Y                            | 75                 | Y                     | Left                              | 3                 | I                                                                     |
| 9           | 40  | F       | Left                 | 2                                | H                                                           | N                          | N                      | N                      | N                   | N                            | 50                 | N                     |                                   |                   |                                                                       |
| 10          | 40  | M       | Right                | 3                                | I                                                           | N                          | N                      | N                      | N                   | N                            | 60                 | N                     |                                   |                   |                                                                       |
| 11          | 41  | F       | Right                | 4                                | H                                                           | N                          | N                      | N                      |                     | Y                            | 58                 | N                     |                                   |                   |                                                                       |
| 12          | 41  | M       | Left                 | 4                                | T+O                                                         | Y                          | N                      | N                      | N                   | N                            | 58                 | N                     |                                   |                   |                                                                       |
| 13          | 41  | M       | Left                 | 2                                | T+O                                                         | N                          | N                      | N                      | N                   | N                            | 58                 | N                     |                                   |                   |                                                                       |
| 14          | 43  | M       | Left                 | 3                                | I                                                           | N                          | N                      | N                      | N                   | N                            | 76                 | N                     |                                   |                   |                                                                       |
| 15          | 44  | M       | Right                | 4                                | T+O                                                         | N                          | N                      | N                      | N                   | N                            | 58                 | N                     |                                   |                   |                                                                       |
| 16          | 44  | F       | Right                | 3                                | H                                                           | N                          | Y                      | N                      | N                   | N                            | 62                 | N                     |                                   |                   |                                                                       |
| 17          | 44  | M       | Right                | 4                                | H                                                           | Y                          | N                      | N                      | N                   | N                            | 65                 | N                     |                                   |                   |                                                                       |
| 18          | 45  | M       | Right                | 3                                | T+O                                                         | N                          | N                      | N                      | N                   | N                            | 49                 | N                     |                                   |                   |                                                                       |
| 19          | 45  | F       | Right                | 4                                | H                                                           | N                          | Y                      | Y                      | Y                   | N                            | 56                 | N                     |                                   |                   |                                                                       |
| 20          | 45  | M       | Right                | 3                                | H                                                           | N                          | N                      | N                      | N                   | N                            | 59                 | N                     |                                   |                   |                                                                       |
| 21          | 45  | F       | Right                | 4                                | T+O                                                         | N                          | N                      | N                      | N                   | Y                            | 70                 | N                     |                                   |                   |                                                                       |
| 22          | 45  | F       | Left                 | 4                                | H                                                           | N                          | N                      | N                      | N                   | N                            | 71                 | N                     |                                   |                   |                                                                       |
| 23          | 45  | F       | Right                | 3                                | H                                                           | N                          | N                      | N                      | N                   | N                            | 76                 | N                     |                                   |                   |                                                                       |
| 24          | 46  | M       | Right                | 4                                | I                                                           | N                          | N                      | N                      | N                   | N                            | 55                 | N                     |                                   |                   |                                                                       |
| 25          | 46  | F       | Left                 | 4                                | T+O                                                         | N                          | N                      | N                      | N                   | N                            | 57                 | N                     |                                   |                   |                                                                       |
| 26          | 46  | F       | Right                | 5                                | I                                                           | N                          | N                      | N                      | N                   | N                            | 62                 | N                     |                                   |                   |                                                                       |
| 27          | 46  | M       | Left                 | 5                                | H                                                           | N                          | N                      | N                      | N                   | N                            | 63                 | N                     |                                   |                   |                                                                       |
| 28          | 46  | F       | Right                | 4                                | T+O                                                         | N                          | N                      | N                      | N                   | N                            | 66                 | N                     |                                   |                   |                                                                       |
| 29          | 46  | M       | Right                | 2                                | H                                                           | N                          | N                      | N                      | N                   | N                            | 67                 | N                     |                                   |                   |                                                                       |
| 30          | 46  | F       | Right                | 2                                | T+O                                                         | N                          | N                      | N                      | N                   | N                            | 69                 | N                     |                                   |                   |                                                                       |
| 31          | 46  | M       | Left                 | 3                                | I                                                           | N                          | N                      | N                      | N                   | N                            | 73                 | N                     |                                   |                   |                                                                       |
| 32          | 46  | F       | Left                 | 4                                | T+O                                                         | N                          | N                      | N                      | N                   | N                            | 76                 | Y                     | Left                              | 3                 | T+O                                                                   |
| 33          | 47  | F       | Right                | 5                                | I                                                           | N                          | N                      | N                      | N                   | N                            | 67                 | N                     |                                   |                   |                                                                       |
| 34          | 47  | F       | Left                 | 4                                | T+O                                                         | N                          | N                      | N                      | N                   | N                            | 56                 | Y                     | Right                             | 2                 | I                                                                     |
| 35          | 48  | F       | Right                | 4                                | I                                                           | N                          | N                      | N                      | N                   | N                            | 49                 | N                     |                                   |                   |                                                                       |
| 36          | 48  | M       | Left                 | 3                                | I                                                           | Y                          | N                      | Y                      | N                   | N                            | 52                 | N                     |                                   |                   |                                                                       |
| 37          | 48  | M       | Left                 | 3                                | I                                                           | N                          | N                      | N                      | N                   | N                            | 60                 | N                     |                                   |                   |                                                                       |
| 38          | 49  | F       | Left                 | 4                                | I                                                           | Y                          | N                      | N                      | N                   | Y                            | 49                 | N                     |                                   |                   |                                                                       |
| 39          | 49  | F       | Right                | 4                                | 4                                                           | N                          | N                      | N                      | N                   | N                            | 67                 | N                     |                                   |                   |                                                                       |
| 40          | 49  | F       | Left                 | 3                                | H                                                           | Y                          | Y                      | Y                      | Y                   | N                            | 75                 | N                     |                                   |                   |                                                                       |
| 41          | 49  | F       | Left                 | 4                                | T+O                                                         | N                          | N                      | N                      | N                   | N                            | 78                 | Y                     | Right                             | 2                 | T+O                                                                   |
| 42          | 50  | M       | Right                | 4                                | H                                                           | N                          | N                      | N                      | N                   | N                            | 52                 | N                     |                                   |                   |                                                                       |
| 43          | 50  | F       | Left                 | 3                                | T+O                                                         | N                          | N                      | N                      | N                   | N                            | 54                 | N                     |                                   |                   |                                                                       |
| 44          | 50  | M       | Left                 | 4                                | H                                                           | N                          | N                      | N                      | N                   | N                            | 64                 | N                     |                                   |                   |                                                                       |
| 45          | 50  | F       | Right                | 5                                | H                                                           | N                          | N                      | N                      | N                   | N                            | 64                 | N                     |                                   |                   |                                                                       |
| 46          | 50  | F       | Right                | 3                                | 4                                                           | N                          | N                      | N                      | N                   | N                            | 75                 | N                     |                                   |                   |                                                                       |
| 47          | 51  | F       | Right                | 5                                | I                                                           | N                          | N                      | N                      | N                   | N                            | 53                 | N                     |                                   |                   |                                                                       |
| 48          | 51  | F       | Left                 | 4                                | T+O                                                         | N                          | N                      | N                      | N                   | N                            | 73                 | N                     |                                   |                   |                                                                       |
| 49          | 51  | M       | Left                 | 3                                | H                                                           | Y                          | N                      | N                      | N                   | N                            | 77                 | N                     |                                   |                   |                                                                       |
| 50          | 52  | F       | Left                 | 3                                | I                                                           | N                          | N                      | N                      | N                   | N                            | 48                 | N                     |                                   |                   |                                                                       |
| 51          | 52  | M       | Right                | 4                                | H                                                           | N                          | N                      | N                      | N                   | N                            | 48                 | N                     |                                   |                   |                                                                       |
| 52          | 52  | M       | Right                | 3                                | H                                                           | N                          | N                      | N                      | Y                   | N                            | 50                 | N                     |                                   |                   |                                                                       |
| 53          | 52  | F       | Right                | 4                                | H                                                           | Y                          | N                      | N                      | N                   | N                            | 53                 | N                     |                                   |                   |                                                                       |
| 54          | 52  | M       | Left                 | 5                                | I                                                           | N                          | N                      | N                      | N                   | N                            | 54                 | N                     |                                   |                   |                                                                       |
| 55          | 52  | F       | Right                | 3                                | I                                                           | N                          | N                      | N                      | N                   | N                            | 69                 | N                     |                                   |                   |                                                                       |
| 56          | 52  | F       | Left                 | 4                                | H                                                           | N                          | N                      | N                      | N                   | N                            | 70                 | N                     |                                   |                   |                                                                       |
| 57          | 52  | M       | Right                | 3                                | I                                                           | N                          | N                      | N                      | N                   | N                            | 74                 | N                     |                                   |                   |                                                                       |
| 58          | 53  | M       | Right                | 2                                | T+O                                                         | N                          | N                      | N                      | N                   | N                            | 51                 | N                     |                                   |                   |                                                                       |
| 59          | 53  | F       | Left                 | 4                                | H                                                           | N                          | N                      | N                      | N                   | Y                            | 53                 | N                     |                                   |                   |                                                                       |

|    |    |   |       |   |     |   |   |   |   |   |    |   |       |   |     |
|----|----|---|-------|---|-----|---|---|---|---|---|----|---|-------|---|-----|
| 60 | 53 | F | Left  | 4 | H   | Y | N | N | N | N | 53 | N |       |   |     |
| 61 | 53 | F | Right | 3 | H   | N | N | N | N | N | 53 | N |       |   |     |
| 62 | 53 | F | Right | 3 | T+O | N | N | N | N | Y | 56 | N |       |   |     |
| 63 | 53 | M | Left  | 3 | T+O | Y | N | N | N | N | 68 | N |       |   |     |
| 64 | 53 | M | Right | 3 | T+O | N | N | N | N | N | 71 | N |       |   |     |
| 65 | 53 | M | Left  | 6 | 4   | N | N | N | N | N | 71 | N |       |   |     |
| 66 | 53 | M | Left  | 3 | 4   | N | Y | N | N | N | 72 | N |       |   |     |
| 67 | 53 | M | Left  | 4 | I   | Y | N | N | Y | N | 75 | Y | Right | 3 | I   |
| 68 | 54 | M | Left  | 3 | T+O | N | N | N | N | N | 56 | N |       |   |     |
| 69 | 54 | F | Left  | 3 | H   | N | N | N | N | N | 61 | N |       |   |     |
| 70 | 54 | F | Right | 4 | H   | N | N | N | Y | N | 67 | N |       |   |     |
| 71 | 54 | F | Left  | 3 | H   | N | N | N | N | N | 74 | N |       |   |     |
| 72 | 46 | F | Left  | 3 | T+O | N | N | N | N | N | 76 | Y | Right | 3 | T+O |
| 73 | 50 | F | Right | 3 | H   | N | N | N | N | Y | 68 | N |       |   |     |
| 74 | 50 | F | Right | 2 | I   | N | N | N | N | N | 71 | N |       |   |     |
| 75 | 51 | F | Left  | 3 | H   | N | N | N | N | N | 49 | N |       |   |     |
| 76 | 51 | F | Right | 5 | 4   | N | N | N | N | N | 57 | N |       |   |     |
| 77 | 51 | M | Right | 3 | I   | N | N | N | N | N | 70 | N |       |   |     |
| 78 | 51 | M | Right | 3 | H   | N | N | N | Y | N | 75 | N |       |   |     |
| 79 | 52 | F | Right | 2 | H   | N | N | N | Y | N | 57 | N |       |   |     |
| 80 | 52 | F | Right | 5 | I   | Y | N | Y | N | N | 59 | N |       |   |     |
| 81 | 52 | F | Left  | 3 | H   | N | N | N | N | N | 61 | N |       |   |     |
| 82 | 52 | M | Right | 4 | I   | N | N | N | N | N | 77 | N |       |   |     |
| 83 | 53 | F | Right | 4 | H   | N | N | N | N | N | 65 | N |       |   |     |
| 84 | 53 | M | Right | 3 | I   | N | N | N | N | N | 67 | N |       |   |     |
| 85 | 53 | F | Right | 4 | I   | N | N | N | N | N | 67 | N |       |   |     |
| 86 | 53 | F | Right | 4 | I   | N | N | N | Y | N | 70 | N |       |   |     |
| 87 | 54 | F | Left  | 4 | H   | N | N | N | N | N | 63 | N |       |   |     |
| 88 | 54 | F | Right | 4 | H   | N | Y | N | N | N | 65 | N |       |   |     |
| 89 | 54 | M | Right | 5 | I   | N | N | Y | N | Y | 76 | N |       |   |     |
